# Supplementary material
Source: PubMed Central journal article supplement (PMC4775235)

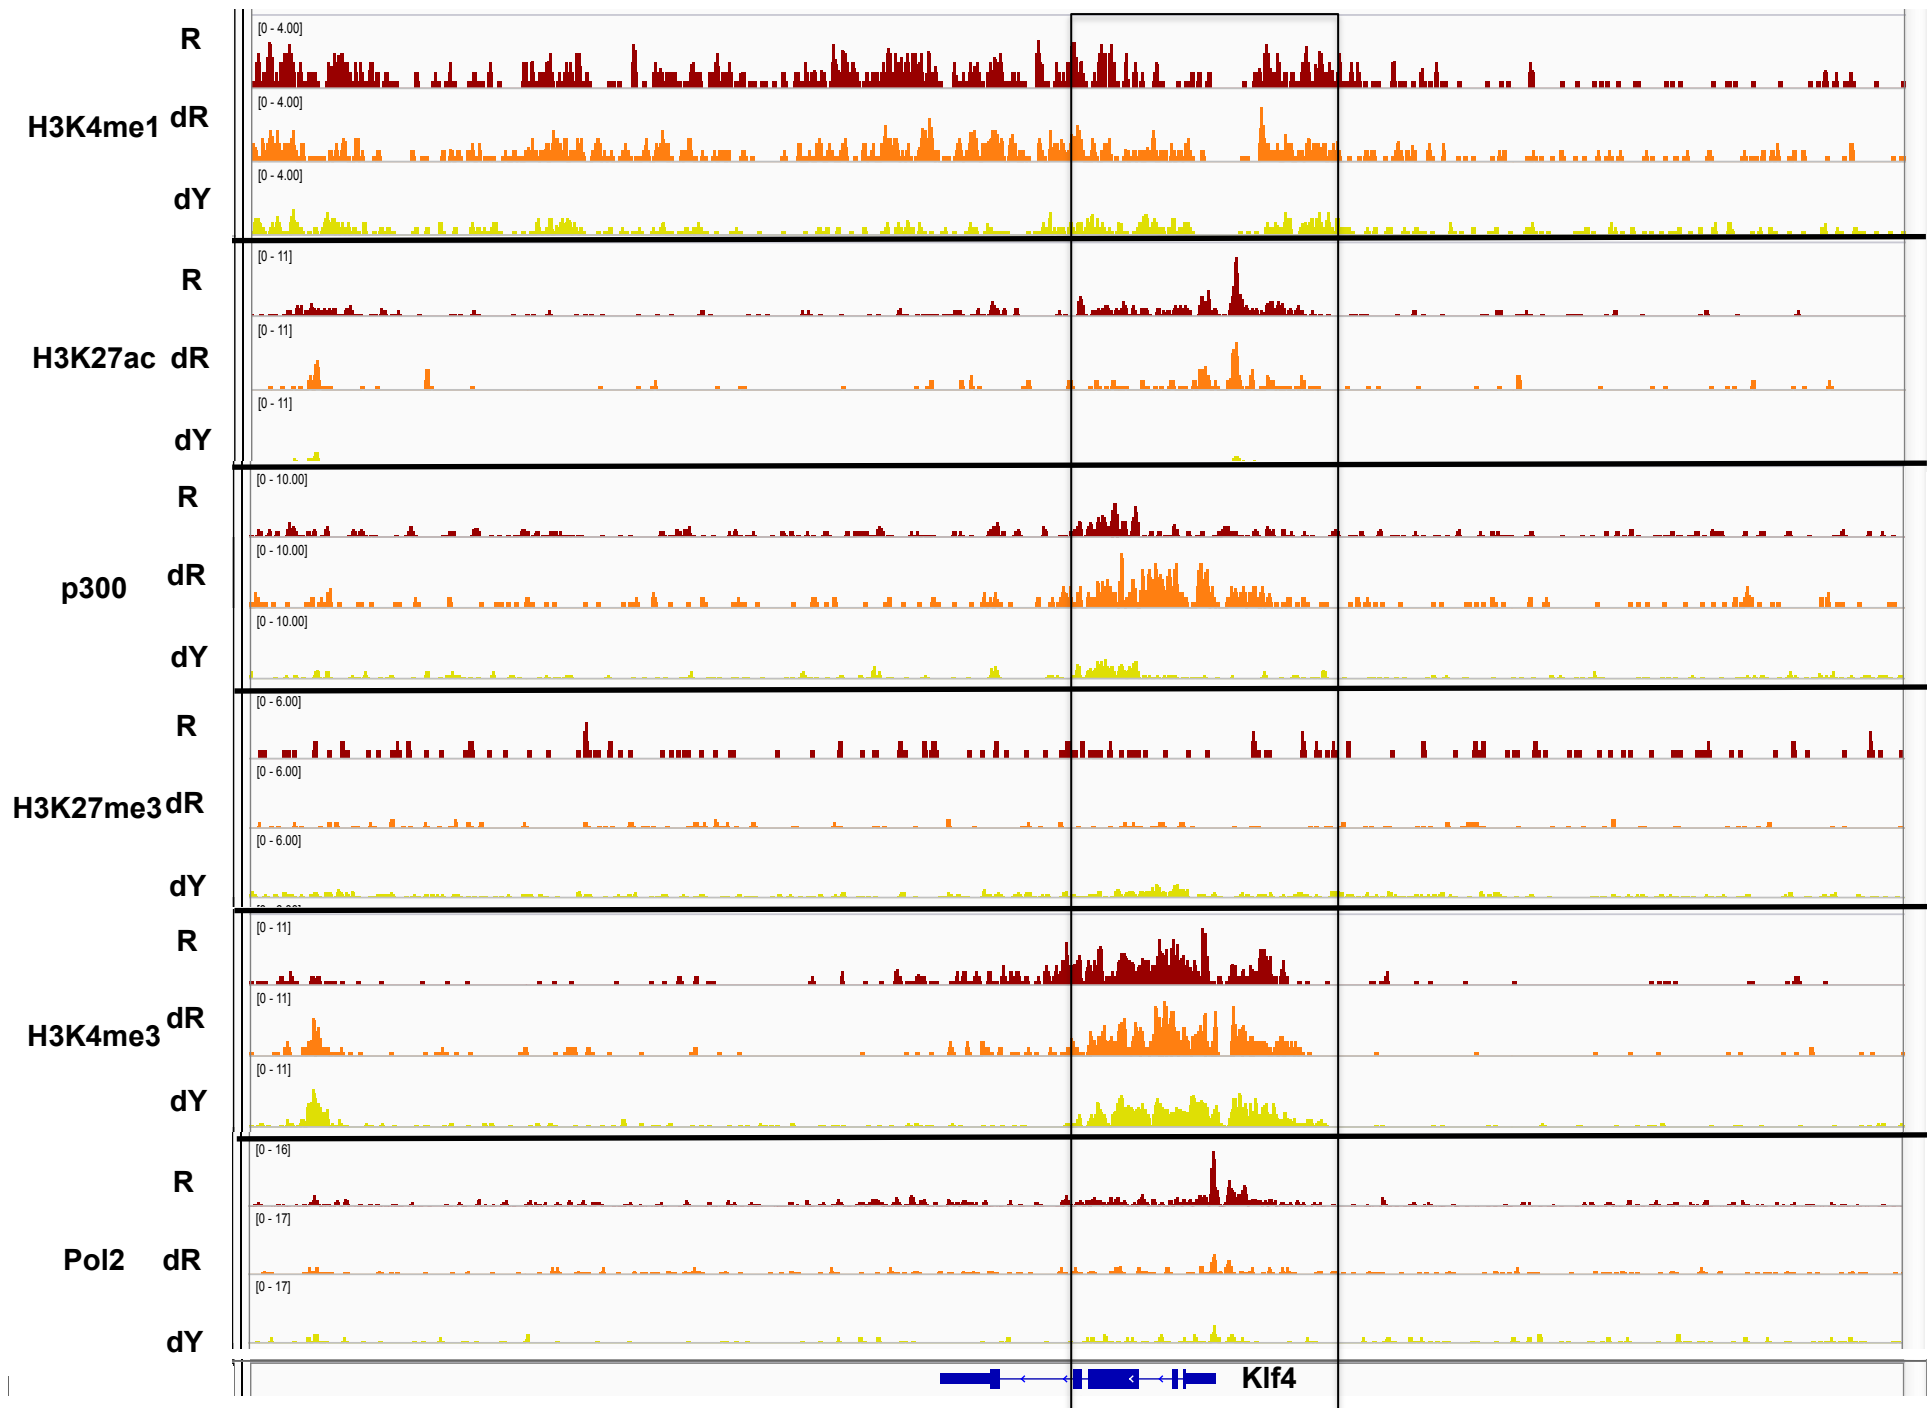

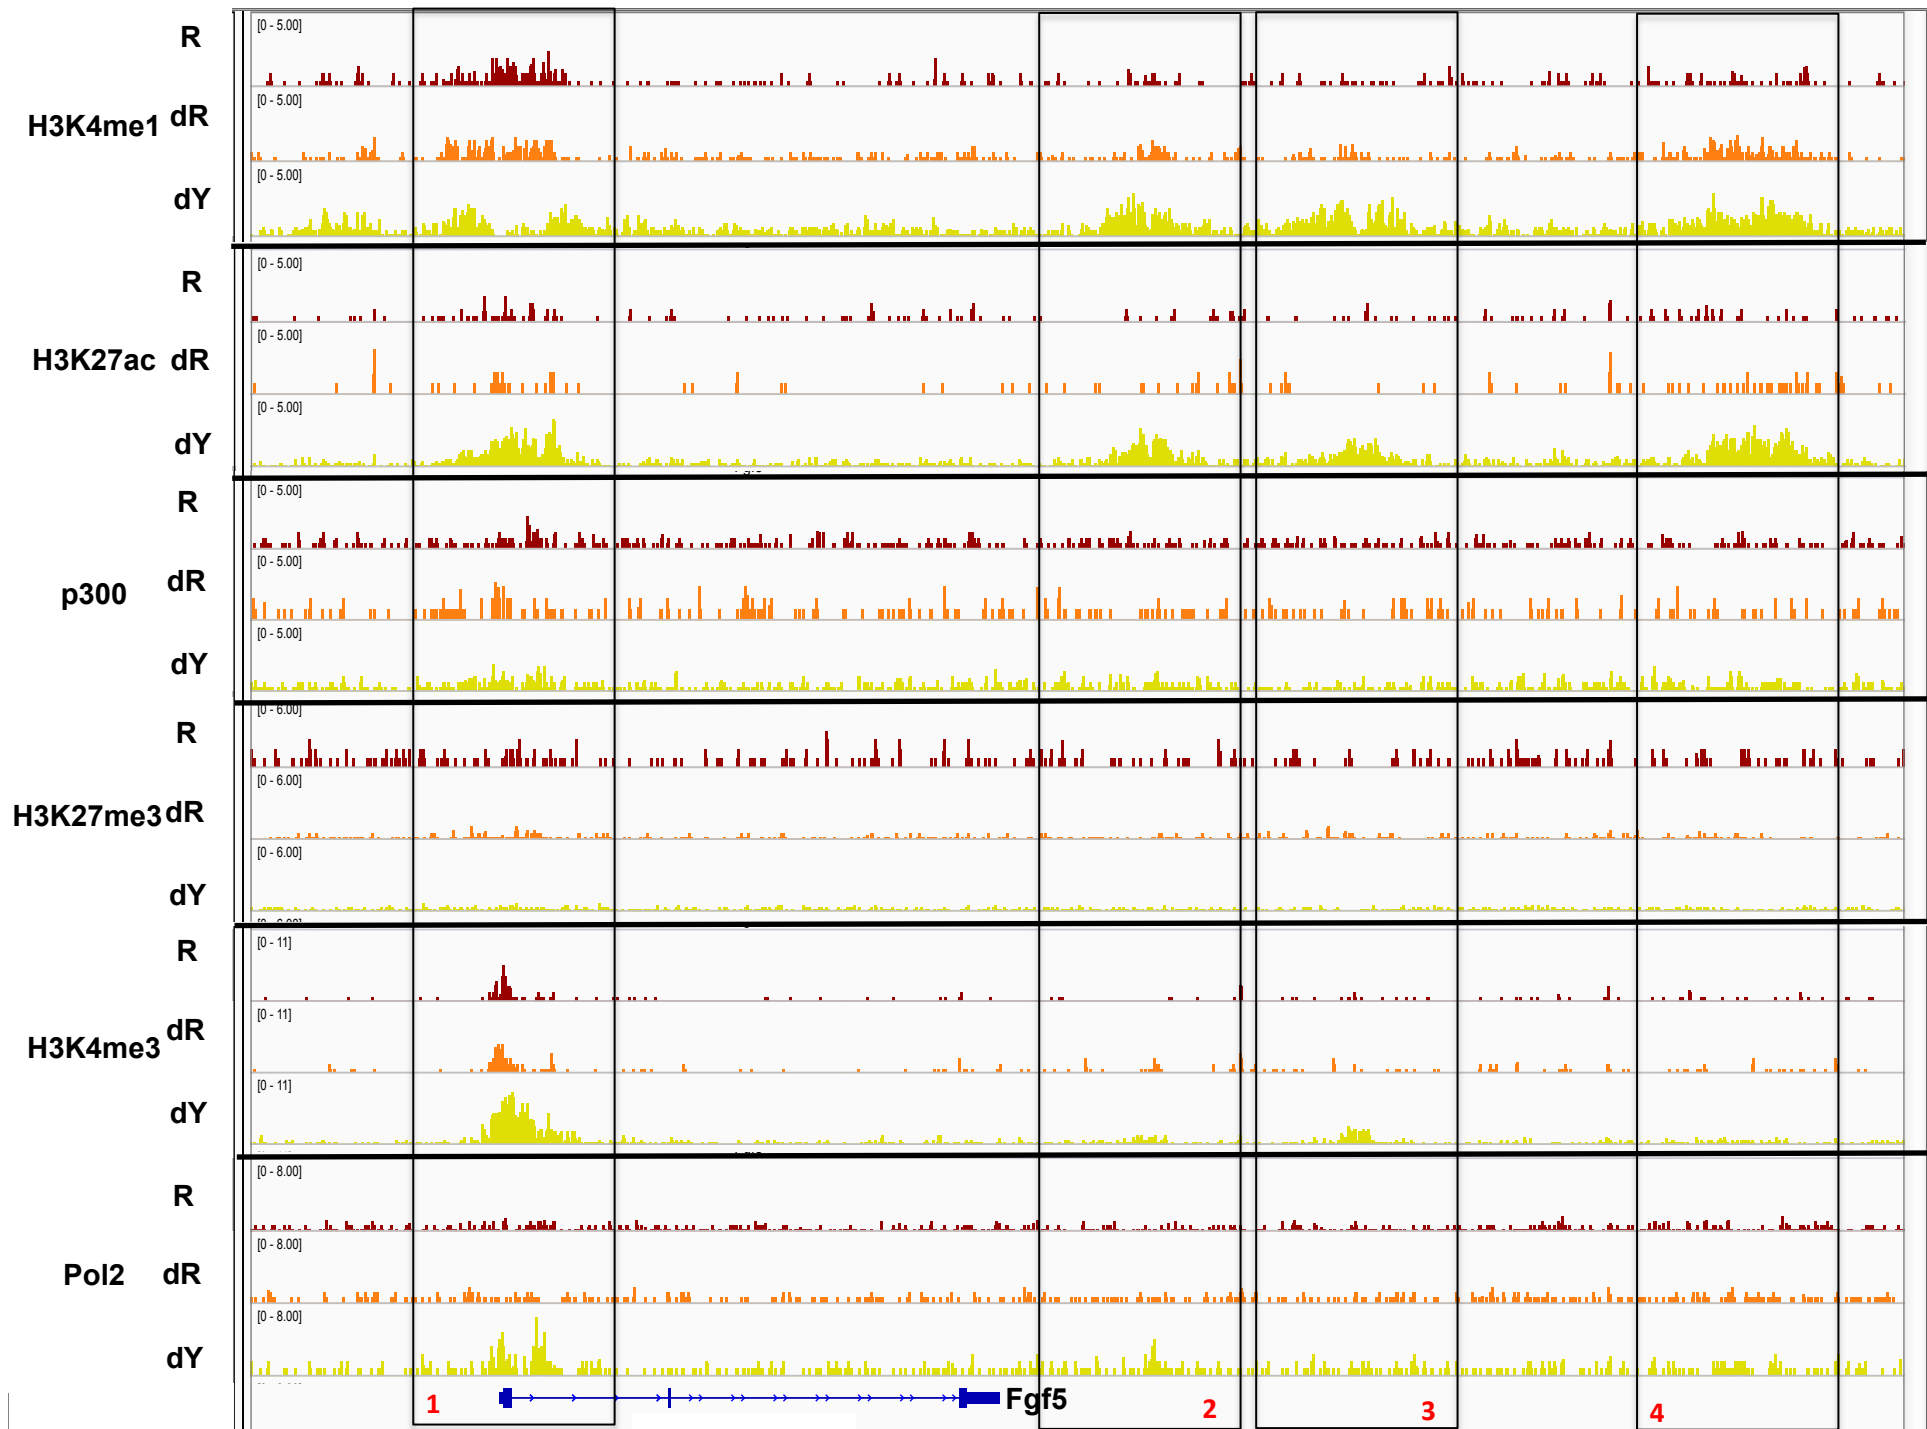

Supplement: NIHMS737645-supplement-3.pdf [file NIHMS737645-supplement-3.pdf]

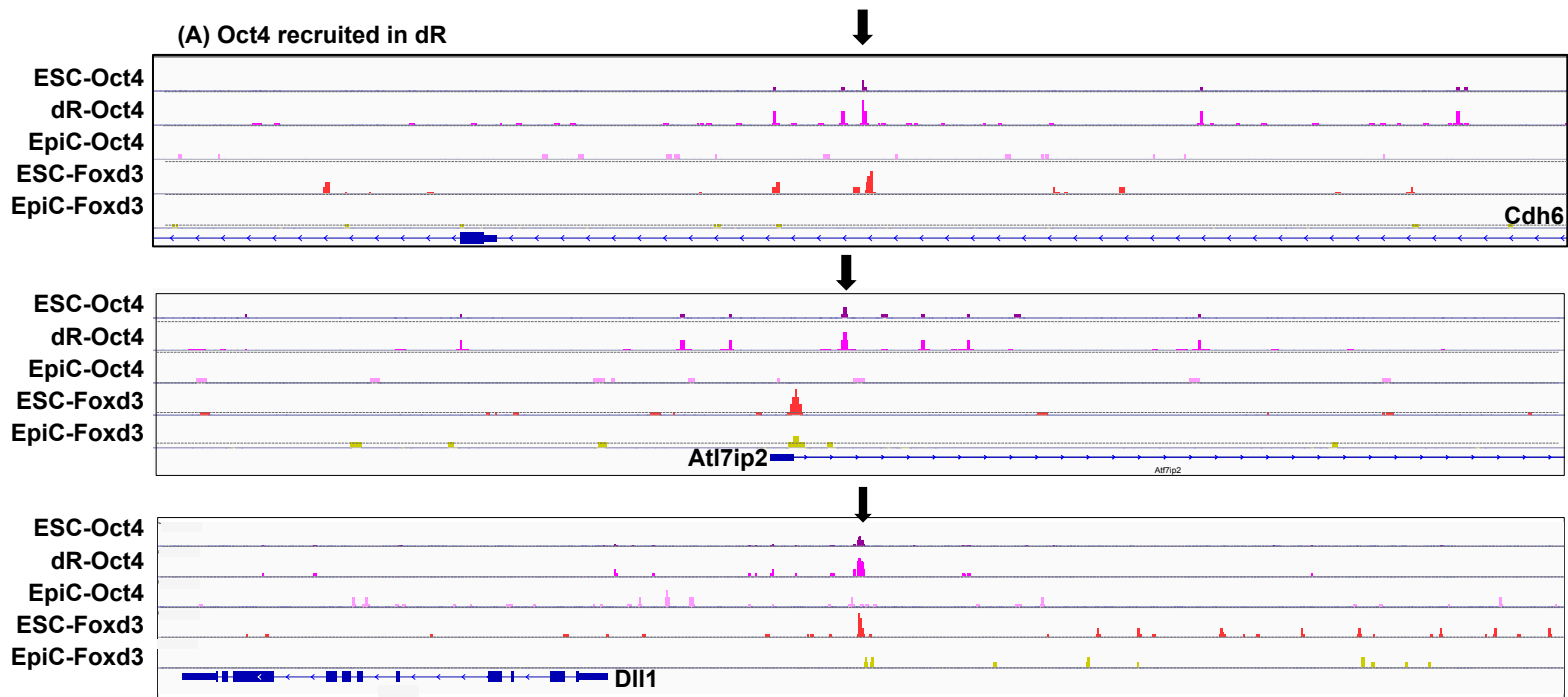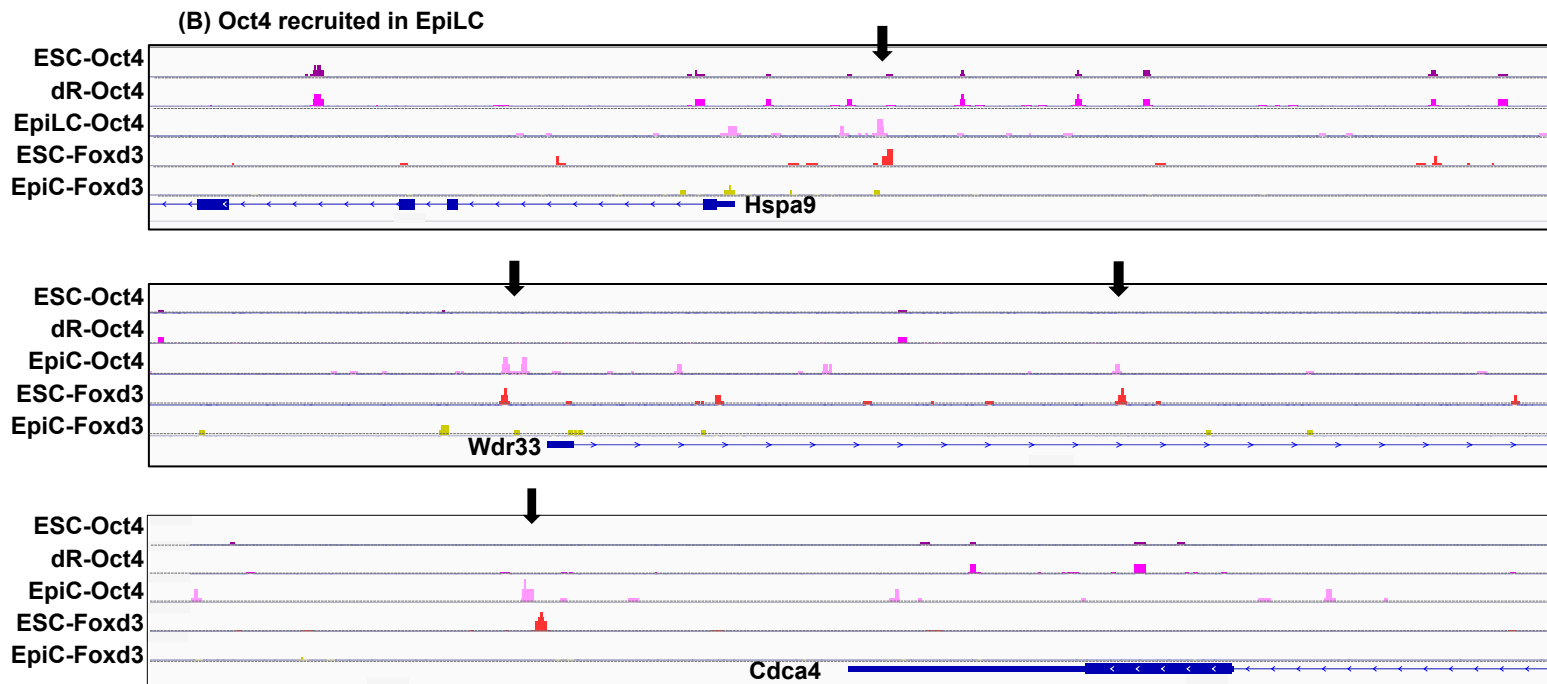

Type 1

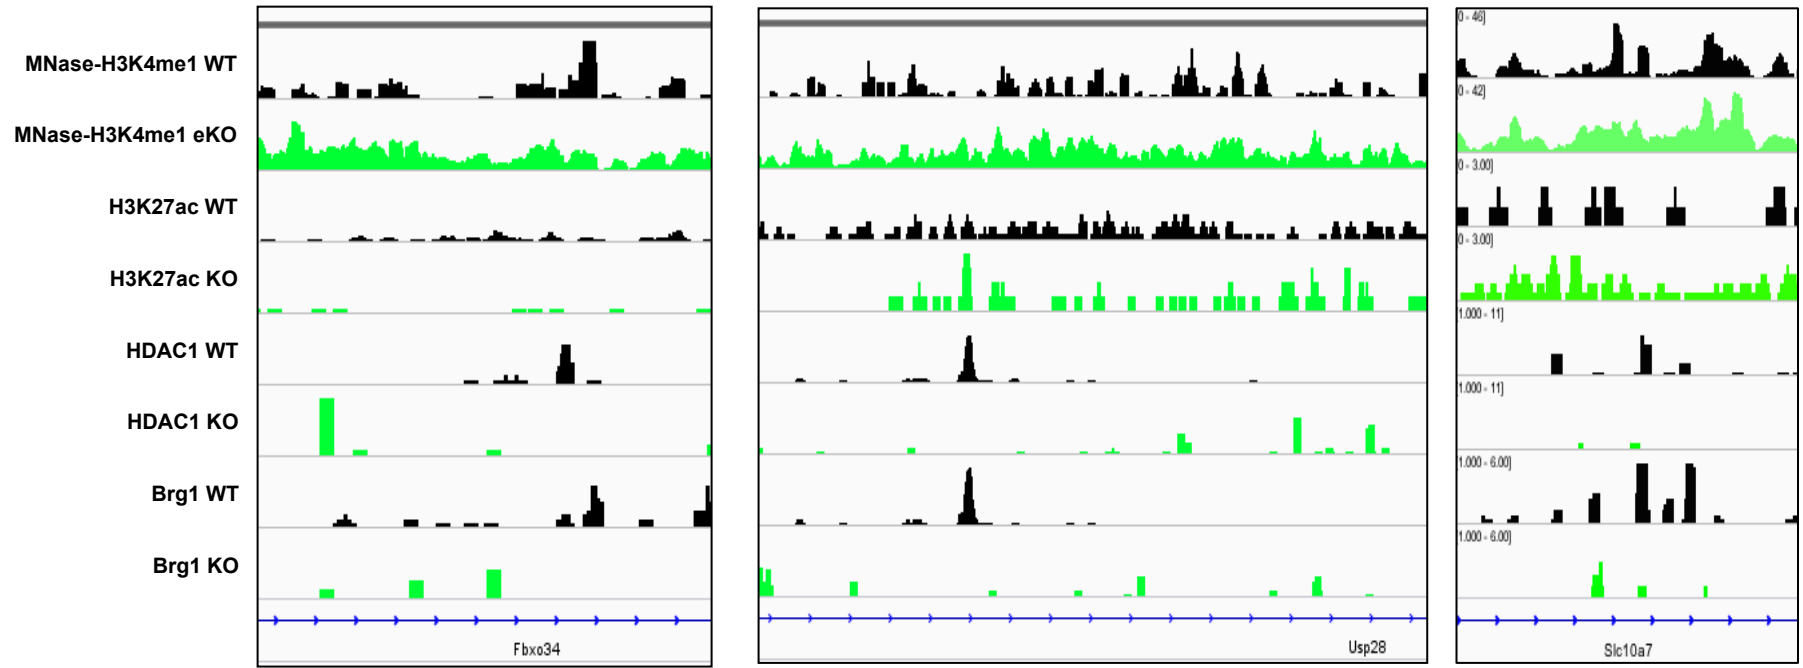

## Type 2

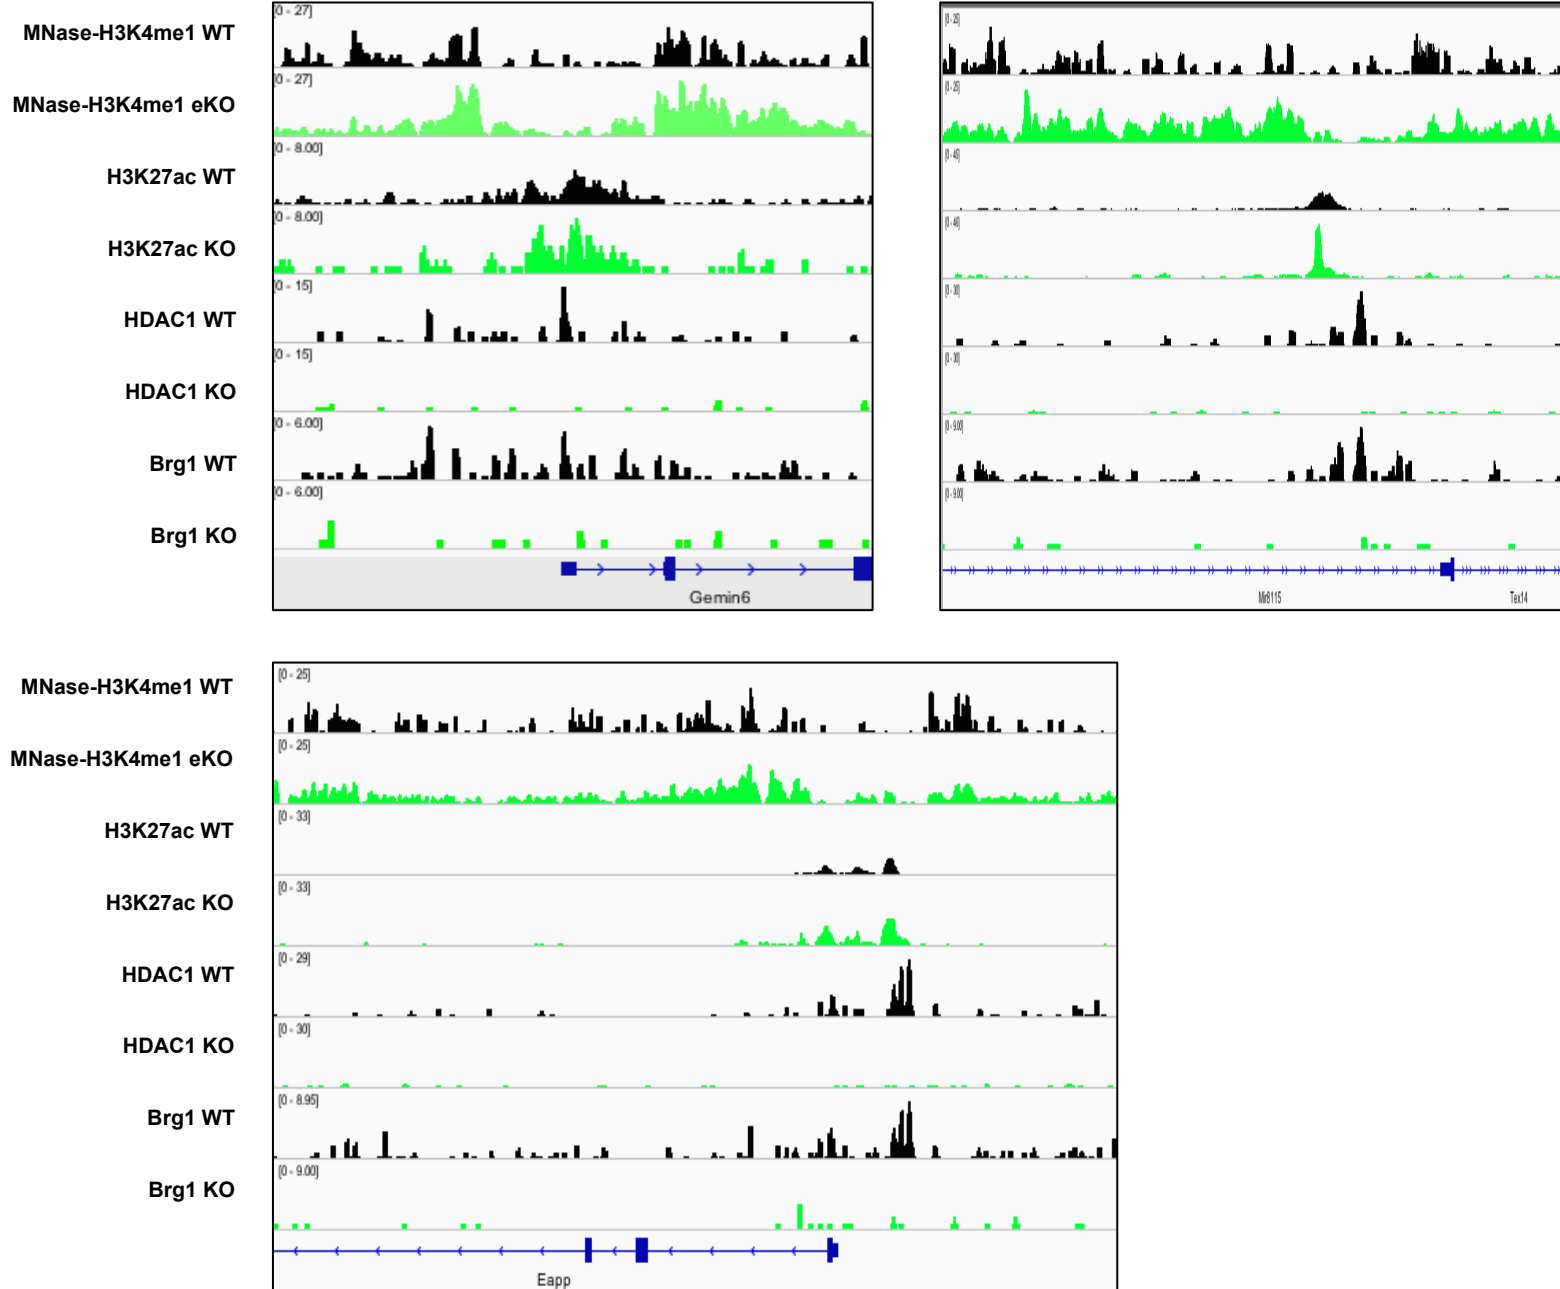

### Type 3

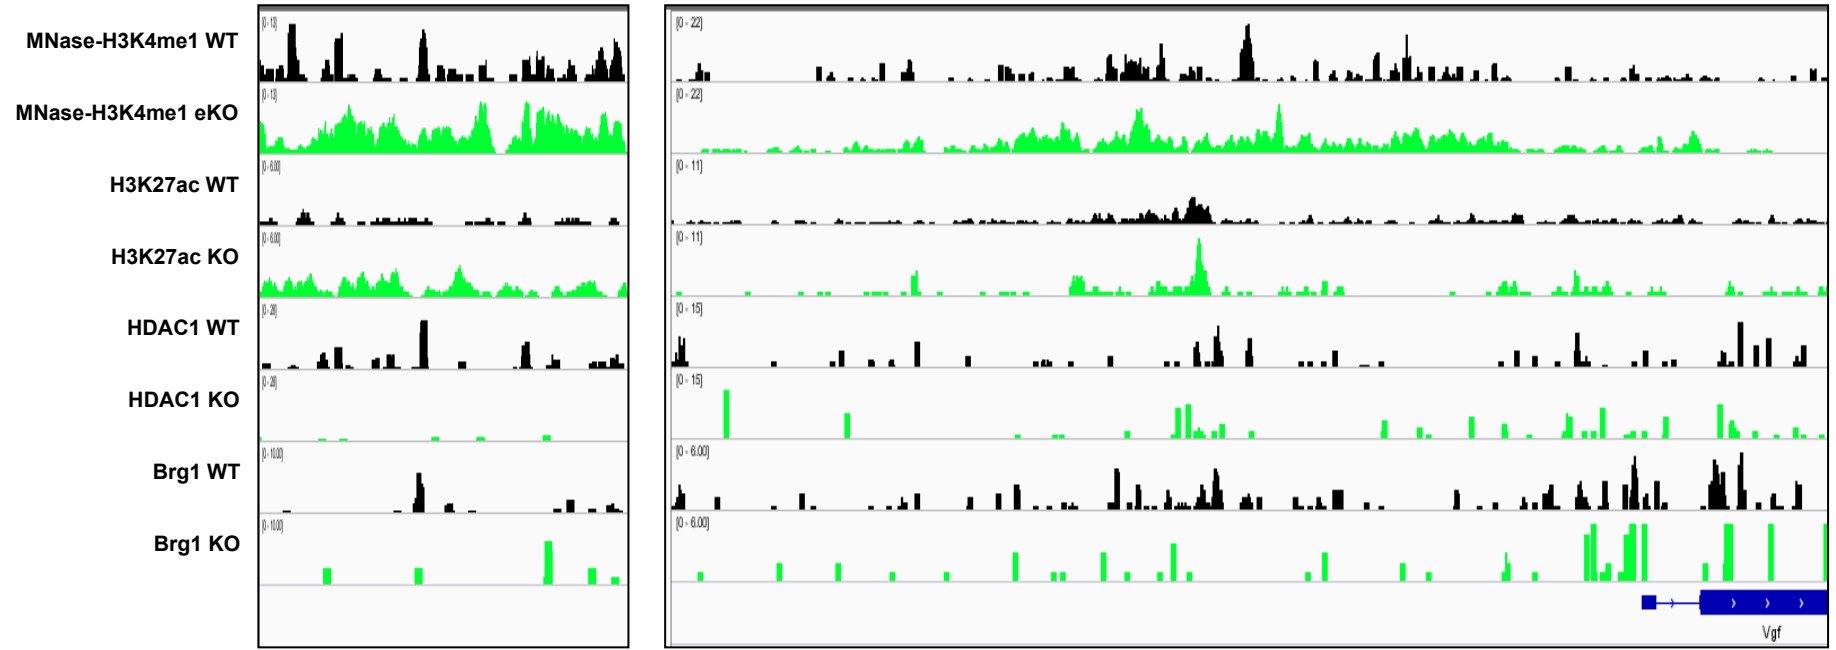

Supplement: NIHMS737645-supplement-6.pdf [file NIHMS737645-supplement-6.pdf]

Type 1



Type 2

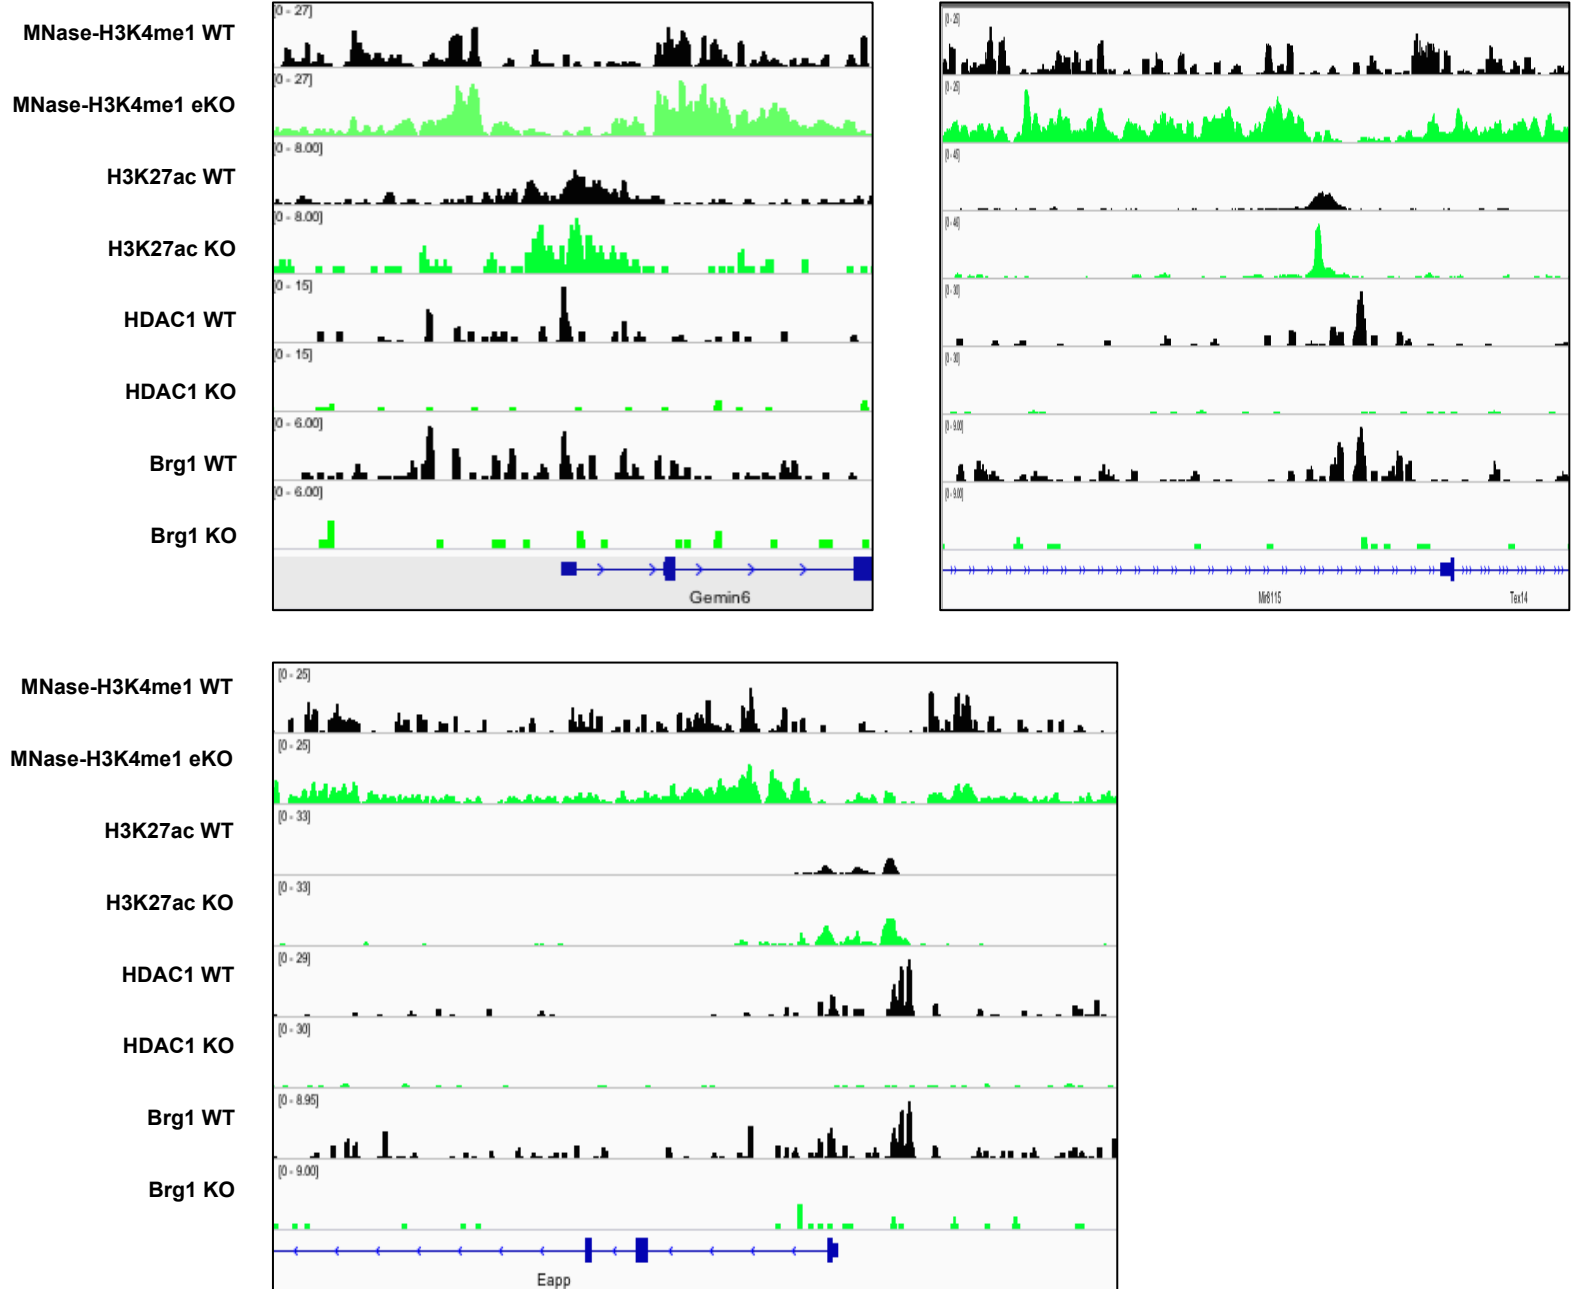

### Type 3



Supplement: NIHMS737645-supplement-7.pdf [file NIHMS737645-supplement-7.pdf]
